# Supplementary material for: Creation of supramolecular assemblies from a dipolar dye molecule by the template effect of 1,3-glucan polysaccharide
Source: Royal Society of Chemistry journal article supplement (doi:10.1039/c0jm02240c), 2010-01-01
Supplement: c0jm02240c.pdf [file c0jm02240c.pdf]

## **Supporting Information**

# **Creation of supramolecular assemblies from a dipolar dye molecule by the template effect of 1,3-glucan polysaccharide**

**Sudip Malik,<sup>a †</sup> Norifumi Fujita,<sup>a</sup> Munenori Numata,<sup>a</sup> Katsuyuki Ogura<sup>b</sup> and Seiji Shinkai**

**\*<sup>ac</sup>**

<sup>a</sup> *Department of Chemistry and Biochemistry, Graduate School of Engineering, Kyushu University, 744 Moto-oka, Nishi-ku, Fukuoka, Japan. E-mail: shinkai\_center@mail.cstm.kyushu-u.ac.jp*

<sup>b</sup> *Graduate School of Engineering, Chiba University, 1-33 Yayoi-machi, Inage-ku, Chiba, Japan.*

<sup>c</sup> *Institute of Systems, Information Technologies and Nanotechnology (ISIT), 203-1 Moto-oka, Nishi-ku, Fukuoka, Japan.*

<sup>†</sup> *Present Address: Polymer Science Unit, Indian Association for the Cultivation of Science, 2A & 2B Raja S. C. Mullick Rd., Jadavpur, Kolkata – 700032, India.*

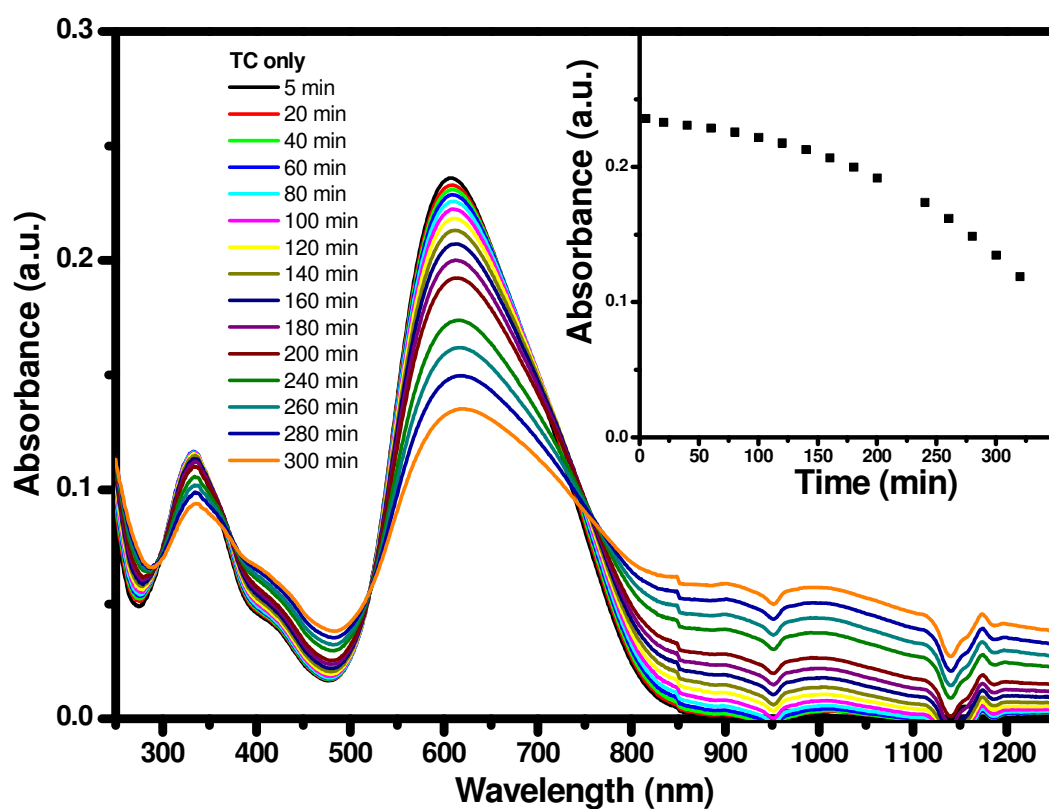

**Fig. S1** Time-dependent UV/NIR spectra of TC only in DMSO/water medium at 25 °C. Inset: plot of absorbance at 608 nm against time.

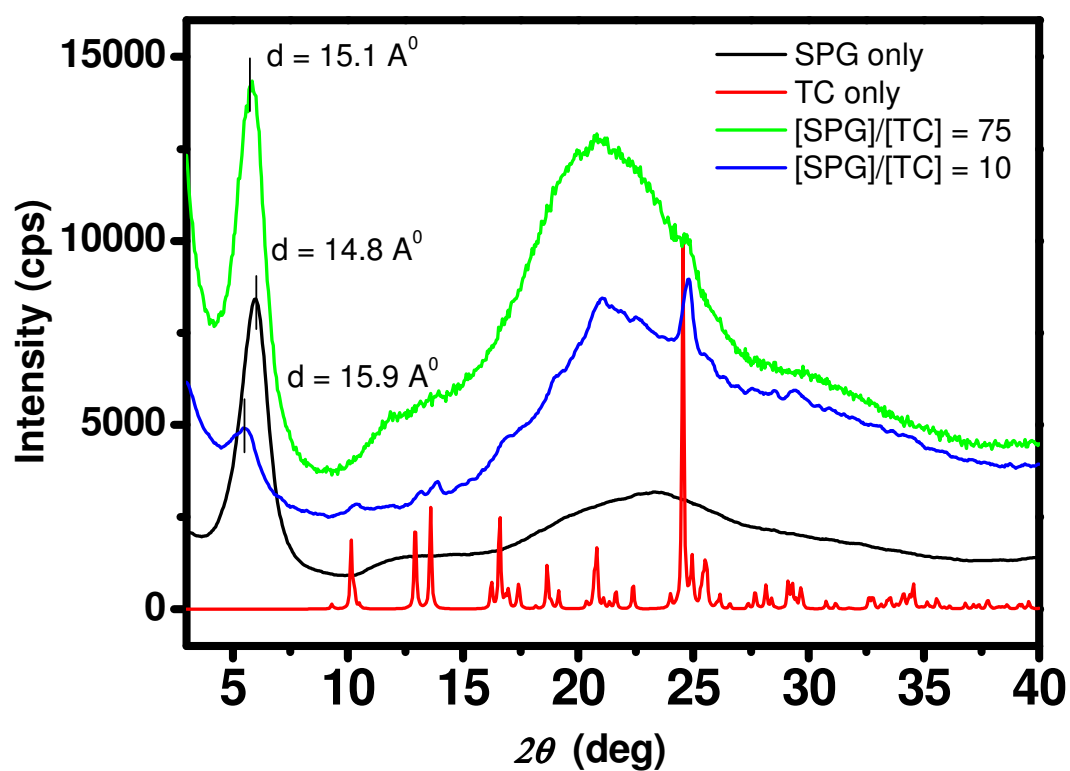

**Fig. S2** X-ray diffraction pattern of SPG, TC and composites (for TC only, the diffraction pattern cited from single crystal data (CCDC data base) is shown).
